# Supplementary material for: Effects of the mycorrhizal fungus Ceratobasidium sp. AR2 on growth and flavonoid accumulation in Anoectochilus roxburghii
Source: PeerJ. 2020 Jan 16;8:e8346. doi: 10.7717/peerj.8346 (PMC6970008; doi:10.7717/peerj.8346)
Supplement: Supplemental Information 1 [file peerj-08-8346-s001.xlsx]

## Sheet: Sheet1
Table S1 Primer designed for qRT-PCR
Genes	Unigene ID	Forward primer sequence (5'-3')	Reverse primer sequence (5'-3')
EF-1-α	Unigene11729	GATGACCGGGAGCATCAATGAC	CTGAGCGTGAACGTGGTATCAC
PAL	CL13945.contig6	GAACAGGACAATGGAGGCGA	ACGGTGTTACTGTCAACGCA
C4H	CL7400.contig2	CTCGCCATCCTCTTGTCGAA	GGTTCAGATCGTCTCCGACC
4CL	Unigene36812	CGGACCGTCTATCGGCTTAC	GAAGGTGGAGGCAGAGAACC
CHS	CL3547.contig2	CCTGACTTCTTCTTCCGCGT	GCTACCTCTTGCCTGACGTT
CHI	CL6389.contig4	GCTCTTGTCTCTGCTCCTGT	TTGGCTGGAAGAAGTCGGAG
F3'H	CL5534.contig1	CTTGGACGTGTTCATTGCGG	GAGTTGGAGCATCACCGTCA
F3H/FLS	CL13017.contig3	GGCGGAGAAGGAGAAGTACG	GGCGGCCAGACATTATGGAA
OMT	CL13313.contig2	GTTCGGCCTATCTCGGTGAG	CAACTCCCCTCTCACTGCTG
GT1	CL449.contig1	TCAGCAGCTTGGTAAGCAGG	TTGCGACCTAAGCCATCCTC
GT2	Unigene3073	CGACCCTGGAATTGCTCGAA	GACTTCTTTGCCTCCACCGT
UFGT	CL13667.contig1	TCCTCCCTCGACTTGTTCCT	AGCATGTTGTCGGAGACGAT
UFRT	Unigene1776	GCACCTCAATCGCATACCCT	GTGGAGTTCAGTGGTGGAGG
DFR	CL4355.contig1	ACAGGTGCCTCGGGTTATCT	TCGGTGATGTCTCCGTATGC
LDOX	CL2219.contig2	GGCACATCATCGCTCACAAT	CGCAGTCTAATCGAGTCGGA
