# Supplementary material for: Effects of the mycorrhizal fungus Ceratobasidium sp. AR2 on growth and flavonoid accumulation in Anoectochilus roxburghii
Source: PeerJ. 2020 Jan 16;8:e8346. doi: 10.7717/peerj.8346 (PMC6970008; doi:10.7717/peerj.8346)
Supplement: Supplemental Information 2 [file peerj-08-8346-s002.xlsx]

## Sheet: Sheet1
Table S2 R, G, B value of leaf color from the non-mycorrhizal and mycorrhizal A. roxburghii
	Ck	Treatment	P value
R value	22	38	0.008
	28	42
	22	39
	20	31
	34	28
	23	32
G value	29	31	0.767
	35	32
	29	35
	27	28
	39	35
	29	31
B value	11	11	0.625
	11	11
	11	8
	7	7
	8	8
	9	9
Note: each R, G, and B values in the table represent the average value of three times
