# Supplementary material for: Effects of the mycorrhizal fungus Ceratobasidium sp. AR2 on growth and flavonoid accumulation in Anoectochilus roxburghii
Source: PeerJ. 2020 Jan 16;8:e8346. doi: 10.7717/peerj.8346 (PMC6970008; doi:10.7717/peerj.8346)
Supplement: Supplemental Information 3 [file peerj-08-8346-s003.xlsx]

## Sheet: Sheet1
Table S3 Summary of sequences analysis
Samples	Clean reads (M)	Clean bases (G)	Q20(%)	Q30(%)	GC(%)	Read Length (bp)
I1	41.39	6.21	96.17	90.35	47.74	150
I2	41.3	6.2	96	89.96	47.62	150
I3	41.23	6.18	95.89	89.76	47.62	150
II1	41.26	6.19	95.81	89.56	49	150
II2	41.04	6.16	95.68	89.28	48.98	150
II3	41.54	6.23	95.94	89.82	48.76	150
