# Supplementary material for: Effects of the mycorrhizal fungus Ceratobasidium sp. AR2 on growth and flavonoid accumulation in Anoectochilus roxburghii
Source: PeerJ. 2020 Jan 16;8:e8346. doi: 10.7717/peerj.8346 (PMC6970008; doi:10.7717/peerj.8346)
Supplement: Supplemental Information 4 [file peerj-08-8346-s004.xlsx]

## Sheet: Sheet1
Table S4 Assembly results
Samples	Unigene				Transcript
	Total number (bp)	Mean length (bp)	N50	GC(%)	Total number (bp)	Mean length (bp)	N50	GC(%)
I1	63, 586	855	1, 331	42.94	97, 438	723	1, 224	43.02
I2	67, 640	807	1, 280	42.81	105, 866	677	1, 168	42.79
I3	63, 321	795	1, 242	43.01	97, 390	671	1, 140	43.04
II1	61, 217	885	1, 421	44.02	92, 355	757	1, 322	44.07
II2	63, 817	895	1, 440	43.75	97, 579	760	1, 330	43.76
II3	66, 885	871	1, 418	43.59	102, 841	737	1, 309	43.58
