# Supplementary material for: Effects of the mycorrhizal fungus Ceratobasidium sp. AR2 on growth and flavonoid accumulation in Anoectochilus roxburghii
Source: PeerJ. 2020 Jan 16;8:e8346. doi: 10.7717/peerj.8346 (PMC6970008; doi:10.7717/peerj.8346)
Supplement: Supplemental Information 6 [file peerj-08-8346-s006.xlsx]

## Sheet: Sheet1
Table S6 The major structural genes involved in flavonoid biosynthesis from transcriptome database Table 6 The major structural genes involved in flavonoid biosynthesis from transcriptome database
Gene name	Number of unigenes	Unigene ID
PAL	9	CL8046. contig1, CL8046. contig2, CL13945. contig1, CL13945. contig2, CL13945. contig3, CL13945. contig4, CL13945. contig5, CL13945. contig6, Unigene28403
C4H	2	CL7400. contig2, CL7400. contig3
4CL	12	CL483. contig3, CL483. contig4, CL1468.contig3, CL5361. contig1, CL7068. contig1, CL13964. contig1, Unigene5892, Unigene7431, Unigene13037, Unigene36740, Unigene36812, Unigene78262
CHS	7	CL3547. contig1, CL3547. contig2, CL3547. contig3, CL3547. contig4,CL8164. contig1, CL8164. contig2, Unigene18095
CHI	4	CL972. contig1, CL972. contig2, CL6389. contig4, Unigene30072
F3H/FLS	15	CL5150. contig1, CL5150. contig2, CL5143. contig1, CL5143. contig3, CL5143. contig5, CL13017. contig 1, CL13017. contig 2, CL13017. contig 3, Unigene247, Unigene908, Unigene2297, Unigene18994, Unigene27479, Unigene62497, Unigene73681
F3’H	10	CL5534. contig1, CL5534. contig2, CL5534. contig3, CL5534. contig4,CL13026. contig1, Unigene2429, Unigene11473, Unigene21900, Unigene57514, Unigene65851
DFR	7	CL4355. contig1, CL4355. contig2, CL4355. contig3, CL4355. contig4, CL4355. contig5, CL4355. contig6, CL4355. contig7
LDOX	7	CL2219. contig1, CL2219. contig2, CL2337. contig1, CL2337. contig2, CL2337. contig3, CL9752. contig3, CL9752. contig4
OMT	6	CL233. contig7, CL13313. contig1, , CL13313. contig2, CL13313. contig3, CL13121. contig2, Unigene24191
GT1	12	CL449. contig1, CL449. contig2, CL449. contig3, CL4056. contig2, CL4056. contig3, CL4056. contig4, CL4056. contig5, CL4056. contig7, Unigene1303, Unigene 2966, Unigene 3073, Unigene4203
GT2	7	CL3481. contig1, CL3481. contig2, CL3481. contig3, CL7064. contig3, CL7809. contig1, CL7809. contig2, CL13280. contig1
UFGT	9	CL13667. contig1, CL13667. contig2, CL13667. contig3, CL13667. contig4, CL13667. contig5, CL13667. contig6, CL13667. contig7, CL13667. contig8, CL13667. contig9
UFRT	2	CL12615. contig6, Unigene 1776
