# Supplementary material for: Effects of the mycorrhizal fungus Ceratobasidium sp. AR2 on growth and flavonoid accumulation in Anoectochilus roxburghii
Source: PeerJ. 2020 Jan 16;8:e8346. doi: 10.7717/peerj.8346 (PMC6970008; doi:10.7717/peerj.8346)
Supplement: Supplemental Information 7 [file peerj-08-8346-s007.xlsx]

## Sheet: Sheet1
Table S7 DEGs in KEGG pathway
#	KEGG pathway	No. of unigenes	Percentage (%)
1	Metabolic pathways	14995	23.9
2	Biosynthesis of secondary metabolites	9004	14.35
3	Carbon metabolism	2209	3.52
4	Spliceosome	2133	3.4
5	Plant-pathogen interaction	2121	3.38
6	Starch and sucrose metabolism	1973	3.16
7	Biosynthesis of amino acids	1972	3.14
8	RNA transport	1939	3.09
9	Endocytosis	1756	2.8
10	Protein processing in endoplasmic reticulum	1746	2.78
11	RNA degradation	1673	2.67
12	Plant hormone signal transduction	1667	2.66
13	Purine metabolism	1380	2.2
14	Ribosome	1349	2.15
15	Ribosome biogenesis in eukaryotes	1284	2.05
16	mRNA surveillance pathway	1267	2.02
17	Phenylpropanoid biosynthesis	1186	1.89
18	ABC transporters	1163	1.85
19	Glycolysis / Gluconeogenesis	1149	1.83
20	Peroxisome	1122	1.79
