# Supplementary material for: Effects of the mycorrhizal fungus Ceratobasidium sp. AR2 on growth and flavonoid accumulation in Anoectochilus roxburghii
Source: PeerJ. 2020 Jan 16;8:e8346. doi: 10.7717/peerj.8346 (PMC6970008; doi:10.7717/peerj.8346)
Supplement: Supplemental Information 9 [file peerj-08-8346-s009.xlsx]

## Sheet: Sheet1
Table S9 The raw data of total flavonoid content
Metabolites	Sample	Sample weight (mg)	Sample volume (μL)	A510	Calibration curve for rutin	Final concentration (mg/mL)	Total flavonoid concentration (mg/g)
Total flavonoid	I1	20.1	800	0.63	y=1.9322x+0.0501	0.300124	11.9452
	I2	20.3	800	0.564		0.265966	10.4814
	I3	20	800	0.597		0.283045	11.3218
	II1	20.1	800	0.81		0.393282	15.653
	II2	20.2	800	0.773		0.374133	14.8172
	II3	20.2	800	0.82		0.398458	15.7805
Table S9 The raw data of 6 flavonoid content
Metabolites	Sample	Sample weight (mg)	Sample volume (μL)	Retention time (min)	Area	Calibration curve	Final concentration (nmol/L)	Metabolite concentration (nmol/g)
Quercetin	I1	51.4	800	9.00125	702.133	y=4.1977x-39.7382	176.733	2.75071
	I2	50.8	800	8.98458	695.587		175.173	2.75864
	I3	50.1	800	8.97623	670.04		169.087	2.7
	II1	50.9	800	9.068	440.809		114.479	1.79927
	II2	50.2	800	9.068	462.701		119.694	1.90747
	II3	50.3	800	9.09303	469.159		121.232	1.92815
Rutin	I1	51.4	800	7.60298	172545	y=16.4044x+133.5839	10510.1	163.581
	I2	50.8	800	7.59463	156092		9507.08	149.718
	I3	50.1	800	7.57795	155627		9478.74	151.357
	II1	50.9	800	7.65307	253893		15469	243.128
	II2	50.2	800	7.66142	277924		16933.9	269.863
	II3	50.3	800	7.67812	250275		15248.5	242.52
Isorhamnetin	I1	51.4	800	9.82815	57.8814	y=4.3920x-5.6848	14.4732	0.225264
	I2	50.8	800	9.84485	65.5467		16.2185	0.255409
	I3	50.1	800	9.8031	66.6291		16.4649	0.262913
	II1	50.9	800	9.91997	248.28		57.8244	0.908832
	II2	50.2	800	9.92832	236.334		55.1044	0.878157
	II3	50.3	800	9.93667	243.514		56.7393	0.902415
Isorhamnetin-3-O-rutinoside	I1	51.4	800	8.2581	1.10908e+06	y=17.5300x+102.9274	63261.6	984.617
	I2	50.8	800	8.24977	1.08208e+06		61721.2	971.988
	I3	50.1	800	8.23307	1.07377e+06		61247.3	978
	II1	50.9	800	8.3165	889078		50711.6	797.039
	II2	50.2	800	8.32485	886137		50543.9	805.48
	II3	50.3	800	8.34153	897195		51174.6	813.911
Kaempferol	I1	51.4	800	9.74885	91.7	y=2.2613x-23.0749	50.7562	0.789979
	I2	50.8	800	9.70712	91.8		50.8004	0.800006
	I3	50.1	800	9.67372	89.22		49.6594	0.792965
	II1	50.9	800	9.76555	ND		ND	ND
	II2	50.2	800	9.77388	ND		ND	ND
	II3	50.3	800	9.78223	ND		ND	ND
Cyanidin-3-glucoside chloride	I1	51.4	800	5.62133	813.582	y=57.0015x+7.1925	14.1468	0.220184
	I2	50.8	800	5.613	713.175		12.3853	0.195045
	I3	50.1	800	5.60467	802.325		13.9493	0.222744
	II1	50.9	800	5.6964	2400.83		41.9925	0.660001
	II2	50.2	800	5.70475	2296.32		40.1591	0.639986
	II3	50.3	800	5.72977	2442.97		42.7319	0.679632
